# Supplementary material for: Tumour-elicited neutrophils engage mitochondrial metabolism to circumvent nutrient limitations and maintain immune suppression
Source: PubMed Central journal article supplement (PMC6269473; doi:10.1038/s41467-018-07505-2), 2018-11-30
Supplement: 41467_2018_7505_MOESM1_ESM.pdf [file 41467_2018_7505_MOESM1_ESM.pdf]

**Tumour-elicited neutrophils engage mitochondrial metabolism to circumvent nutrient limitations and maintain immune suppression**

**Rice et al.**

## Supplemental figure 1

### Identification of bone marrow derived Immature c-Kit<sup>+</sup> neutrophils

**a)** Representative flow cytometry gating strategy of C57 bl-6 mouse bone marrow for Ly-6G<sup>+</sup> neutrophils prior to CXCR2 and c-Kit gating. **b)** Percentage of immature neutrophils in bone marrow subsets as determined by scoring of unsegmented nuclei with an immature chromatin pattern. Data (n=2) represents two similar experiments. **c)** Representative flow cytometry of Ly-6C and CD115 expression in c-Kit<sup>+</sup> (red) and c-Kit<sup>-</sup> (blue) neutrophils compared to monocytes. **d)** Representative flow cytometry of CD62L, CD11b and CXCR4 expression in c-Kit<sup>+/−</sup> neutrophils compared to Ly6G negative cells. **e)** Representative flow cytometry gating strategy of C57 bl-6 mouse bone marrow for Ly-6G<sup>+</sup>, c-Kit<sup>−</sup>/CXCR2<sup>+</sup> and c-Kit<sup>+</sup>/CXCR2<sup>−</sup> neutrophils. All error bars display mean±SEM.

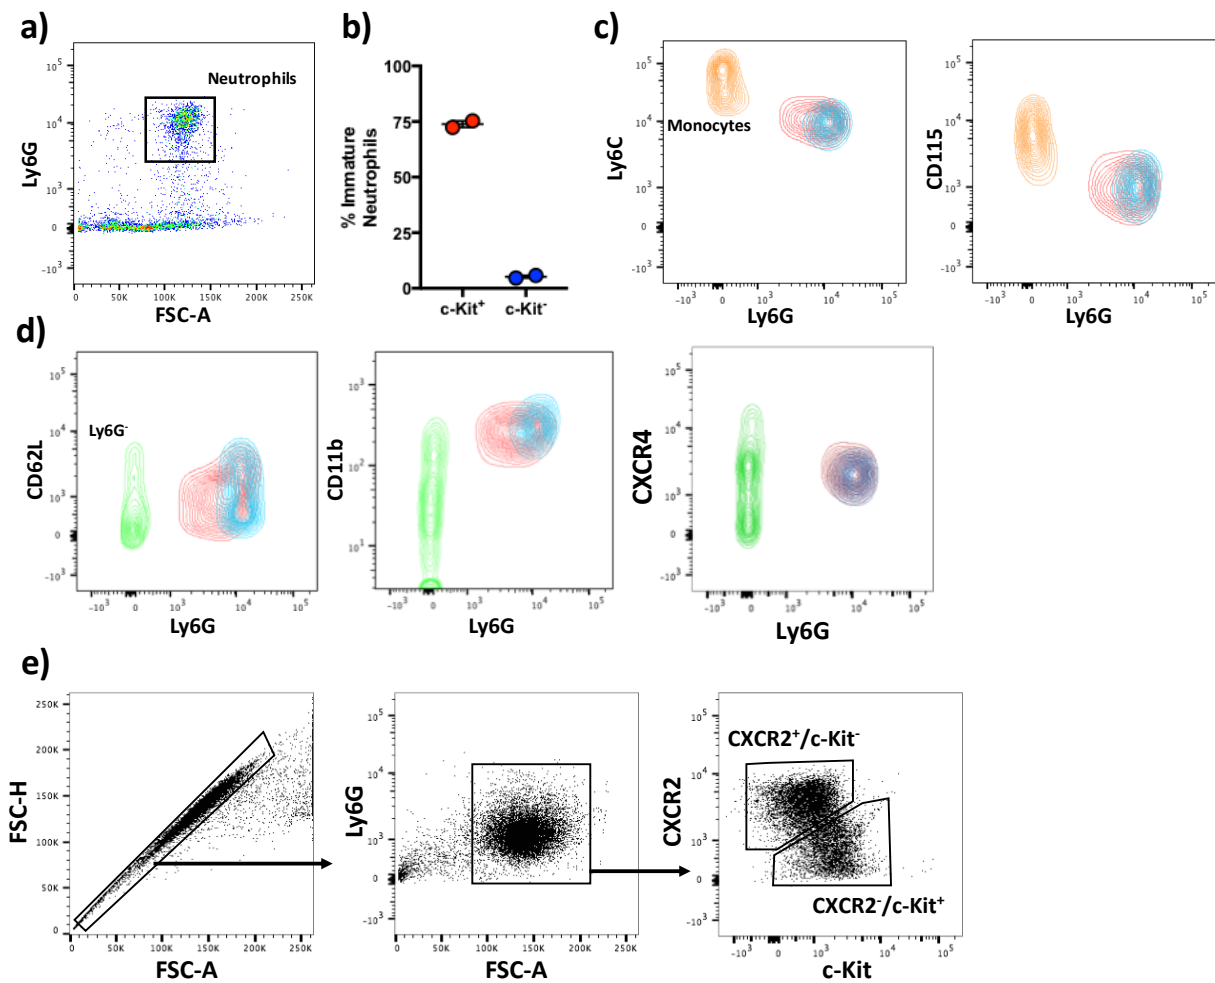

## Supplemental figure 2

### Immature bone marrow resident neutrophils have an altered metabolic phenotype

**a)** Representative flow cytometry gating strategy of C57 bl-6 mouse bone marrow for Ly-6G<sup>+</sup>, c-Kit<sup>+</sup> and c-Kit<sup>-</sup> neutrophils and Ly-6G<sup>int</sup> c-Kit<sup>+</sup> cells. **b)** Representative mitochondrial stress test of the cell populations identified in representative flow cytometry. **c)** Quantification of mitochondrial spare respiratory capacity from mitochondrial stress tests in supplemental Fig. f. Data shown represents one experiments (Ly-6G<sup>+</sup> n=5, Ly-6G<sup>int</sup> n=3). Data were analysed by one way-ANOVA with Dunnett's multiple post-tests indicated. **d)** Representative nuclear morphology of Ly-6G<sup>int</sup> c-Kit<sup>+</sup> cells following cytospin and Romanowsky staining. Scale bar represents 10 $\mu$ m. **e)** Representative flow cytometry histograms for Ly-6G, Ly-6C and CD115 staining in bone marrow resident populations. **f)** Quantification of flow cytometry staining for Ly-6G, Ly-6C and CD115 staining in bone marrow resident populations. Data shown represents one experiments (n=3) and were analysed by one way-ANOVA with Dunnett's multiple post-tests indicated. **g)** Western blotting of cytosolic (CYT) and mitochondrial (MIT) isolates for: aconitase 2 (ACO2), anti-lipoate to detect pyruvate dehydrogenase (PDH2-E2) and  $\alpha$ -ketoglutarate dehydrogenase ( $\alpha$ KGDH-E2), NDUFS1 (complex I) and succinate dehydrogenase B (SDHB) (complex II). Controls are TUB =  $\beta$ -tubulin, TOM20, a mitochondrial membrane protein, and cytosolic (c-HSC20) or mitochondrial HSC20. Data shown represents two independent experiments (n=3). **h)** Mitochondrial DNA content was measured as a ratio 16S/Actin $\beta$  as measured by RT-PCR after treatment of c-Kit<sup>-</sup> and c-Kit<sup>+</sup> with SCF (20ng/ml) for 12 hours. Data (n=4) from two independent experiments was analysed by Students t-test. **i)** In-gel assays for mitochondrial complex I, II and IV activities in c-Kit<sup>+/-</sup> neutrophils. \* indicates an unidentified NADPH utilizing enzyme. **j)** Heat-map of metabolite peak areas measured by gas chromatography-mass spectrometry as defined by log<sub>2</sub> of difference from the mean. Data shown were significant by students t-test (n=5 per group from one experiment). *p* values \*<0.05 \*\* <0.01 \*\*\*<0.001. All error bars display mean $\pm$ SEM.

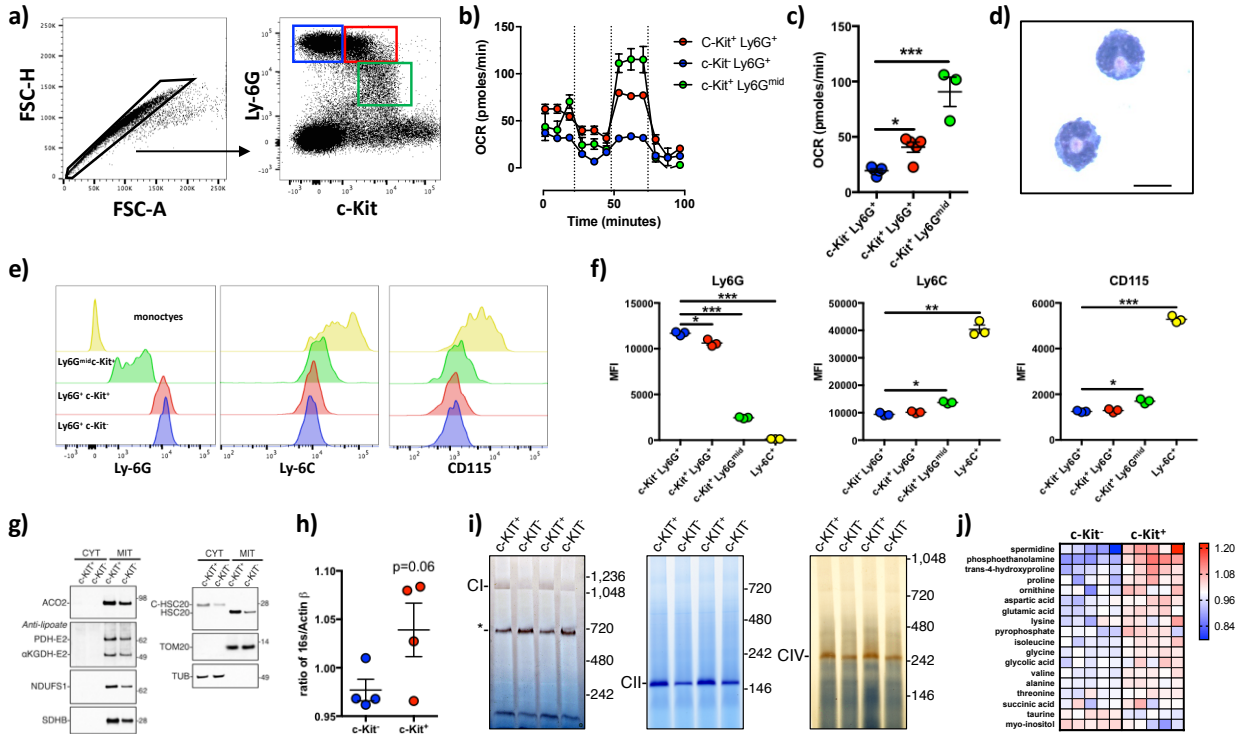

### Supplemental figure 3

#### Neutrophil mitochondria facilitate free radical production

**a)** Area under the curve (AUC) oxygen consumption rates (OCR) of early (0-55 minutes) and late (55-306 minutes) respiratory burst following pre-treatment with indicated inhibitor and phorbol 12-myristate 13-acetate (PMA) stimulation. Data (n=6) from two independent experiments (quantification from figure 2a). Data were analysed by two-way ANOVA with Dunnett's multiple post-tests indicated. **b)** AUC of PMA stimulated respiratory burst following a second treatment of indicated inhibitor (post) and pre-treatment with indicated inhibitor (pre). Data (n=5) from two independent experiments (Quantification from figure 2b) and were analysed by paired t-test. **c)** AUC of PMA stimulated respiratory burst post treatment with etomoxir and pre-treatment with 2DG. Data (n=5) is representative of two independent experiments (quantification from figure 2d). Data were analysed by unpaired t-test. **d)** AUC of PMA stimulated respiratory burst post treatment with indicated inhibitor and pre-treatment with 2DG. Data (n=5) and is from two independent experiments (quantification from figure 2f). Data were analysed by two way-ANOVA with Dunnett's multiple post-tests indicated. **e)** AUC of PMA stimulated respiratory burst post treatment with oligomycin with and without Carbonyl cyanide-4-(trifluoromethoxy)phenylhydrazone (FCCP) and pre-treatment with 2DG. Data (n=4) and represents a single experiment (quantification from figure 2g). Data were analysed by two way-ANOVA with Dunnett's multiple post-tests indicated. **f)** Representative flow cytometry histograms of 2',7'-dichlorofluorescein diacetate (DCFDA) and aminophenyl fluorescein (APF) intensity in bone marrow derived neutrophils from wild type and NOX null (*p47<sup>-/-</sup>*) mice following 20min stimulation with PMA. **g)** Basal mitochondrial OCR from *p47<sup>-/-</sup>* bone marrow neutrophils following stimulation as indicated. Data is representative of 3 independent experiments. Data were analysed by two-way ANOVA with Tukey's multiple comparison post-tests (Control v PMA \*\*, Control v 2DG PMA \*\*\*, PMA v 2DG PMA \*\*\*). Concentrations were: rotenone (100nM), atpenin (1µM), antimycin A (1µM), 2-DG (100mM), PMA (1µg/ml), etomoxir (100µM), FCCP (660nM) and oligomycin (1.26µM), DCFDA (5µM), APF (5µM). *p* values \*\* <0.01 \*\*\*<0.001. All error bars display mean±SEM.

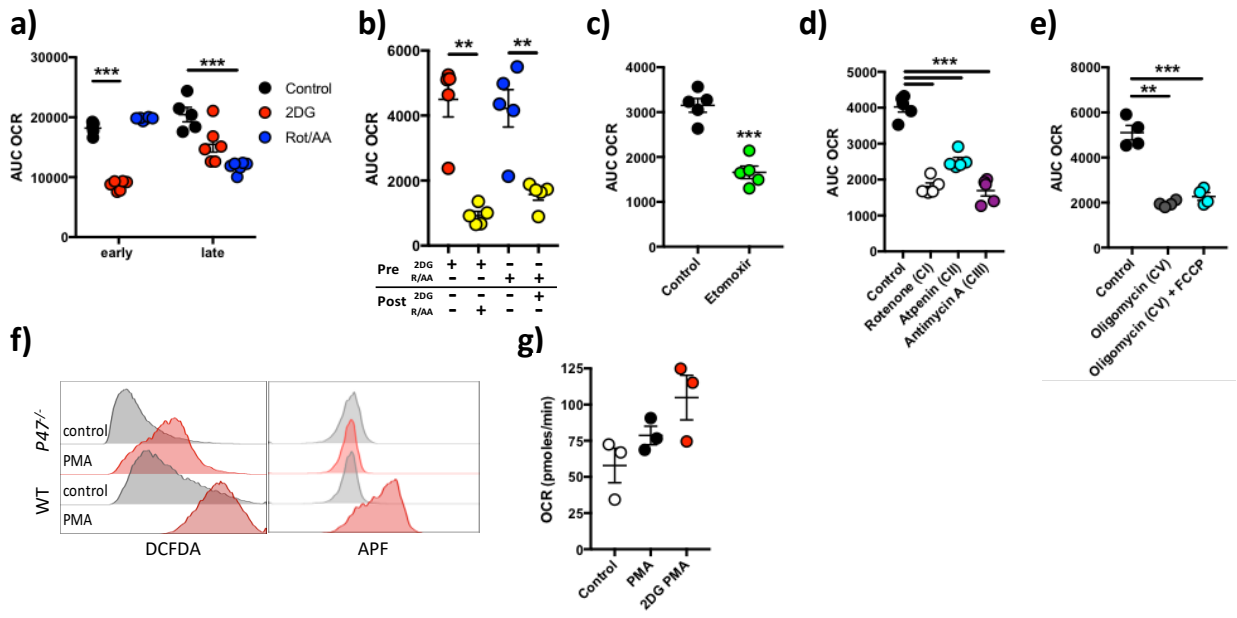

## Supplemental figure 4

### c-Kit<sup>+</sup> neutrophils utalise their mitochondrial in response to zymosan

a) Relative area under the curve (AUC) of C57BL/6 bone marrow c-Kit<sup>+</sup> and c-Kit<sup>-</sup> subsets neutrophils following stimulation with zymosan in the presence of rotenone (100nM) or antimycin A (1 $\mu$ M) compared to vehicle control. Data (c-Kit<sup>+</sup> n=3, c-Kit<sup>-</sup> n=4) from 4 independent experiments and were analysed by two-way ANOVA with Sidak's multiple comparisons represented on graph. *p* values \*\* <0.01 \*\*\*<0.001. All error bars display mean $\pm$ SEM.

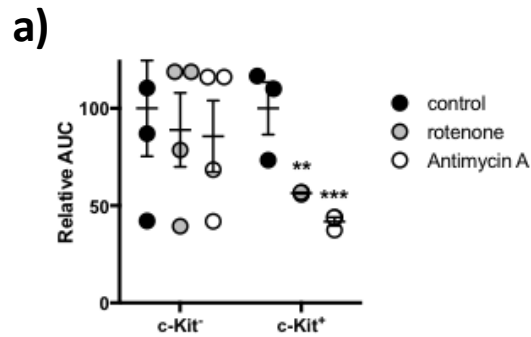

## Supplemental figure 5

### 4T1 tumours elicit c-Kit<sup>+</sup> neutrophils with mitochondrial metabolism

**a)** Neutrophil counts from naïve and 4T1 tumour-bearing Balb-c mouse tissues. Data are from two independent experiments and were analysed by two-way ANOVA with Tukey's post-test indicated on graph (n=5). **b)** Image of a 4T1 (14 day) tumour section with hematoxylin and eosin stain, examples of neutrophils are highlighted by arrows. Image is representative of multiple photographs from independent experiments. **c)** Flow cytometry plots displaying increased c-Kit expression in Ly-6G<sup>+</sup> splenic and circulating neutrophil populations from naïve and 4T1 bearing mice. Boxes indicate c-Kit<sup>+</sup> neutrophils. Data shown represents multiple experiments. **d)** Representative flowcytometry histograms for Ly6G, CD62L, CXCR2 and c-Kit expression in splenic neutrophils from naïve and 4T1 bearing mice. **e)** Percentage of immature nuclear morphology in c-Kit<sup>+</sup> neutrophils from 4T1 bearing mice spleens. **f)** Representative mitochondrial stress test of neutrophils derived from blood of 4T1 bearing mice compare to healthy naïve controls (left). Quantification of basal and maximal OCR (n=3) from three independent experiments (right). Data were analysed by two way-ANOVA with Sidak's multiple post-tests indicated. **g)** Representative Extracellular acidification rates (ECAR) and oxygen consumption rates (OCR) traces from a mitochondrial stress test of neutrophils derived from bone marrow and the tumour site in 4T1 bearing mice. **h)** In-gel assays for mitochondrial complex II and IV activities in splenic neutrophils from naïve and 4T1 bearing mice. **i)** Western blotting of mitochondrial complex III subunit (UQCRCFS1) with voltage-dependent anion channel (VDAC) as a loading control in splenic neutrophils from naïve and 4T1 bearing mice. Data (e and f) (n=2) from a single experiment. **j)** Heat-map of metabolite peak areas measured via gas chromatography-mass spectrometry as defined by log<sub>2</sub> of difference from the mean (n=5 per group from one experiment). *p* values \*<0.05 \*\*\*<0.001. All error bars display mean±SEM.

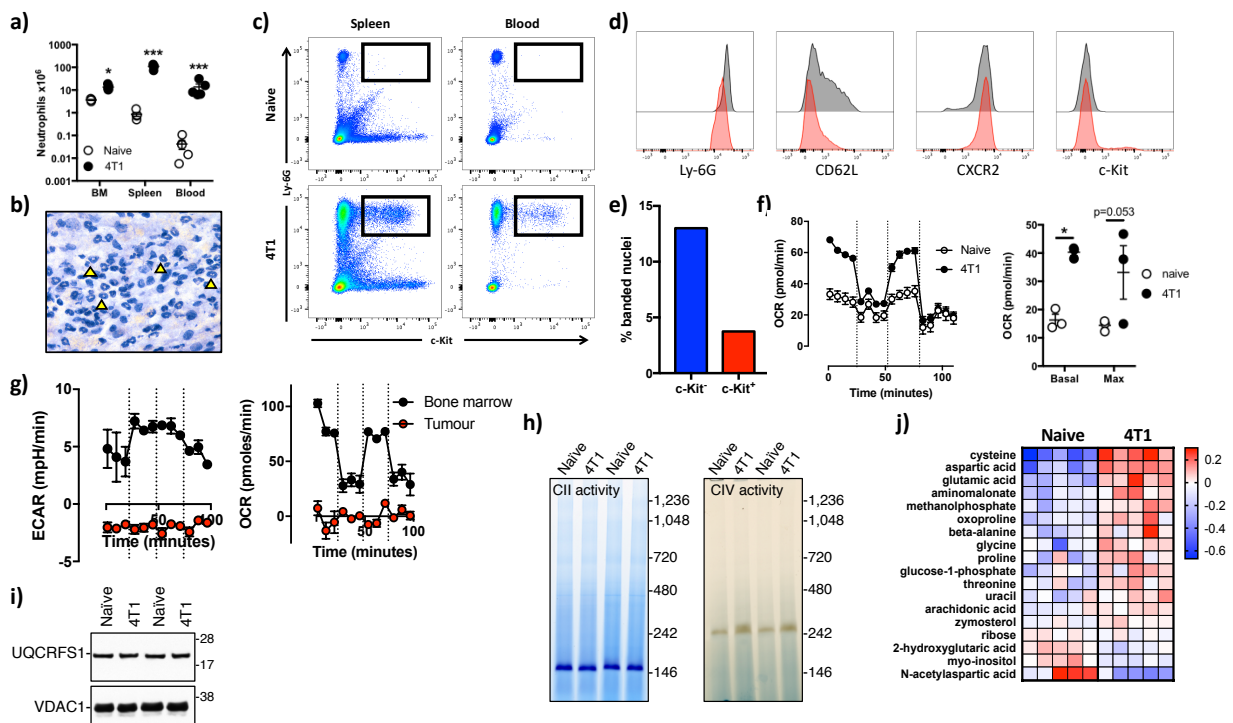



## Supplemental figure 6

### 4T1 tumours produce SCF but do not express c-Kit

**a)** SCF production from 4T1 cultures *in vitro* compared to media alone. Data is representative of two independent experiments. Combined data from independent experiments were analysed by two-way ANOVA (4T1 n=5 media n=4)  $p < 0.001$ . **b)** Representative flow cytometry histograms of anti-c-Kit (red) compared to isotype controls (black) in 4T1 cells derived from *in vitro* cultures. **c)** Non-homogenous end joining (NHEJ) induced mutation rates from CRIPR candidates 50-1 and 51-1 and a non-transformed 4T1 control. **d)** *in vitro* SCF production from 4T1 cell lines which received CRISPR plasmid. Data is from two independent experiments and were analysed by two way ANOVA (4T1 n=5, 50-1 and 51-1 n=4)  $p < 0.001$ . All error bars display mean  $\pm$  SEM.

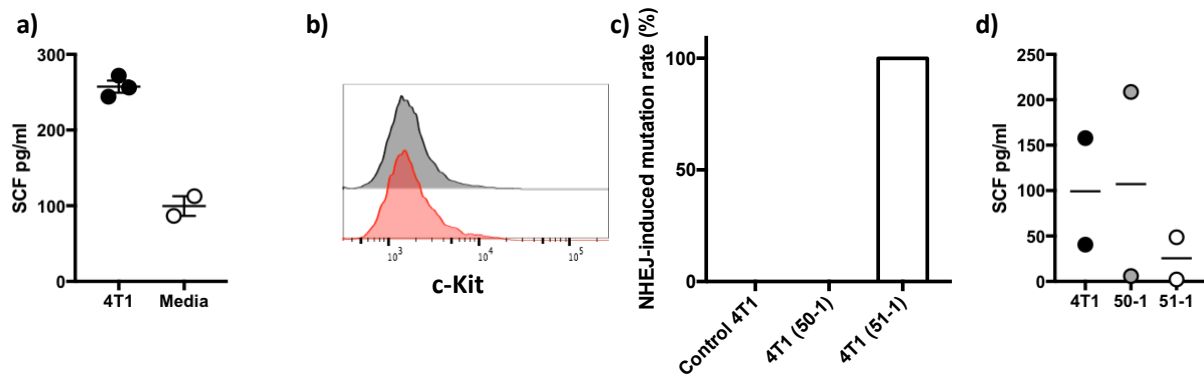

## Supplemental figure 7

### Activated neutrophils inhibit T cell function

**a)** CD3<sup>+</sup> T cell viability as measured by non-permeable Sytox DNA staining following 3 day culture alone (T cells), co-culture with unstimulated neutrophils (control) or neutrophils pre-stimulated with PMA. Data (n=3) are from a single experiment and were analysed by one-way ANOVA with Tukey's multiple comparisons indicated on graph. **b)** Representative flow cytometry histograms of Cell Trace violet dye used to measure rounds of proliferation under culture conditions described in (a) (left). Proliferation index of CD3<sup>+</sup> T cells as calculated from cell trace violet histograms (right). Data (n=3) are from a single experiment and were analysed by one-way ANOVA with Tukey's multiple comparisons indicated on graph. **c)** Interferon- $\gamma$  (IFN- $\gamma$ ) production from T cell co-cultured with unactivated neutrophils (control) or neutrophils pre-stimulated with PMA (PMA). Data (n=3) are from a single experiment and were analysed by paired t-test. **d)** CD8<sup>+</sup> T cell killing following co-culture with splenic neutrophils. Neutrophils were pre-activated with PMA in the presence of 2-deoxy glucose (2DG, 100mM), data is relative to PMA pre-treatment of neutrophils alone. Data (naïve n=4, 4T1 n=3) is from two independent experiments. *p* values \*\* <0.01 \*\*\*<0.001. All error bars display mean $\pm$ SEM.

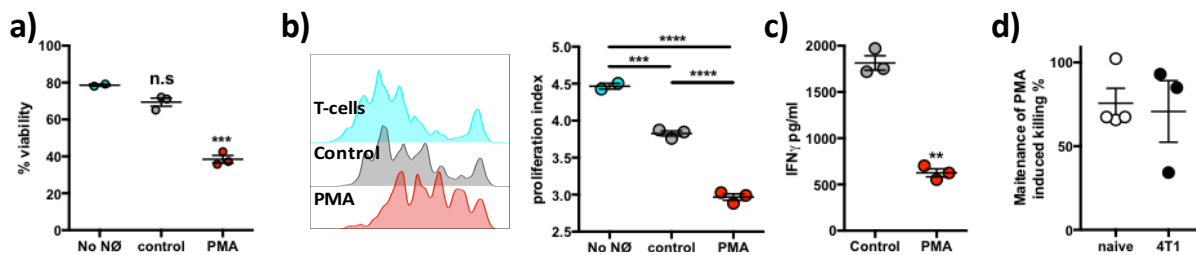

**Supplementary Table 1**  
**Antibodies used for flow cytometry**

| <b>Antibody target</b> | <b>Fluorophore</b> | <b>Company and Catalogue number</b> | <b>Dilution</b> |
|------------------------|--------------------|-------------------------------------|-----------------|
| Mouse Ly6G             | Pacific Blue       | Biolegend 127612                    | 1/100           |
| Mouse Ly6G             | APC                | Biolegend 127614                    | 1/100           |
| Mouse Ly6C             | PerCP              | Biolegend 128028                    | 1/100           |
| Mouse CXCR2            | FITC               | Biolegend 149310                    | 1/100           |
| Mouse c-Kit            | APC                | Biolegend 135108                    | 1/50            |
| Mouse c-Kit            | PE                 | Biolegend 135106                    | 1/50            |
| Mouse CD115            | APC                | Biolegend 135510                    | 1/100           |
| Mouse CD62L            | Fitc               | Biolegend 104406                    | 1/100           |
| Mouse CD4              | APC                | BD Bioscience 553051                | 1/100           |
| Mouse CD8a             | PER CP             | BD Bioscience 553036                | 1/100           |
| Human CD10             | PerCP/Cy5.5        | Biolegend 312216                    | 1/30            |
| Human CD14             | FITC               | BD Bioscience 347493                | 1/30            |
| Human CD15             | APC                | Biolegend 301908                    | 1/30            |
| Human CD16             | PerCP/Cy5.5        | BD Bioscience 338426                | 1/30            |
| Human CD16             | PE                 | BD Bioscience 561313                | 1/30            |
